# Supplementary material
Source: PubMed Central journal article supplement (PMC7966050)
Supplement: 2501_tables.pdf [file 2501_tables.pdf]

**On-line Table 1: CTP parameters in patients who achieved LRC with RT compared with LRF<sup>a</sup>**

|            |         | Percentage Change from Pre-RT to        |                                         |                                         |                                                  |
|------------|---------|-----------------------------------------|-----------------------------------------|-----------------------------------------|--------------------------------------------------|
| LRC Status |         | Week 2,<br>LRF (n = 2);<br>LRC (n = 13) | Week 4,<br>LRF (n = 2);<br>LRC (n = 12) | Week 6,<br>LRF (n = 1);<br>LRC (n = 10) | 6 Weeks Post-RT,<br>LRF (n = 2);<br>LRC (n = 10) |
| BF         | LRF     | -18.1 (15.7)                            | 315.7 (470.8)                           | -69.0 (NA)                              | -46.2 (40.7)                                     |
|            | LRC     | 27.5 (47.7)                             | -5.3 (60.3)                             | 31.8 (90.1)                             | -29.1 (49.1)                                     |
|            | P value | .046                                    | .511                                    | NA                                      | .663                                             |
| BV         | LRF     | -18.8 (10.9)                            | 30.5 (81.3)                             | -61.5 (NA)                              | -38.8 (43.9)                                     |
|            | LRC     | 13.3 (42.7)                             | -18.4 (32.4)                            | 5.5 (55.8)                              | -25.0 (38.7)                                     |
|            | P value | .053                                    | .549                                    | NA                                      | .737                                             |
| MTT        | LRF     | 10.7 (9.4)                              | -37.6 (47.5)                            | 41.7 (NA)                               | 21.6 (3.4)                                       |
|            | LRC     | -3.8 (32.7)                             | 21.4 (106.0)                            | -1.5 (55.2)                             | 18.4 (45.8)                                      |
|            | P value | .245                                    | .281                                    | NA                                      | .834                                             |
| CP         | LRF     | -21.3 (48.2)                            | 360.6 (509.2)                           | -28.1 (NA)                              | 53.5 (166.3)                                     |
|            | LRC     | 131.1 (289.3)                           | 105.3 (288.4)                           | 16.2 (165.7)                            | 80.7 (283.5)                                     |
|            | P value | .106                                    | .606                                    | NA                                      | .868                                             |

<sup>a</sup>Data are presented as mean ± SD. P values are calculated from an independent samples t test comparing mean percentage change in the LRC versus LRF groups.

**On-line Table 2: BF (mL/100 g/min) in patients who achieved LRC with RT compared with LRF**

|     | Patient No. | Baseline | Week 2 | Week 4 | Week 6 | 6 Weeks Post-RT |
|-----|-------------|----------|--------|--------|--------|-----------------|
| LRF | 1           | 52.1     | 36.9   | 390.1  | 16.2   | 43.1            |
|     | 2           | 54.7     | 50.9   | 45.3   |        | 13.7            |
| LRC | 1           | 95.2     | 81.3   | 34.8   | 167.2  | 103.0           |
|     | 2           | 161.3    | 259.5  | 162.3  | 63     | 131.2           |
|     | 3           | 48.3     | 87.5   | 84.4   | 50.8   | 22.5            |
|     | 4           | 96.4     | 158.6  | 145.6  | 271.8  | 178.7           |
|     | 5           | 76.6     | 113.0  | 94.8   | 58.7   | 24.4            |
|     | 6           | 28.3     | 55.7   | 57.0   | 58.4   | 16.9            |
|     | 7           | 119.6    | 115.8  | 54.3   | 92.8   | 99.0            |
|     | 8           | 85.3     | 113.0  | 75.5   | 83.2   | 30.6            |
|     | 9           | 174.6    | 181.3  | 31.5   | 23.9   | 21.1            |
|     | 10          | 208.2    | 92.0   | 41.8   | 508.2  |                 |
|     | 11          | 134      | 237.4  | 143.5  |        | 87.6            |
|     | 12          | 252.6    | 230.4  | 174.1  |        |                 |
|     | 13          | 53.7     | 40.6   |        |        |                 |
